# Supplementary material for: Immunomodulatory effect of bovine lactoferrin during SARS-CoV-2 infection
Source: PubMed Central journal article supplement (PMC11524939; doi:10.3389/fimmu.2024.1456634), 2024-10-17
Supplement: DataSheet1.pdf [file DataSheet1.pdf]

## Supplementary Material

### Supplementary Figures and Tables

Supplementary Table 1. Primers used in gene expression method for *in vitro* assays.

| Gene            | Sense                    | Antisense                  |
|-----------------|--------------------------|----------------------------|
| <i>ATP6V0E1</i> | GTGCTCAGTCTTTGAGGTCAC    | AAGTGGTCTGGTTTGGAGGT       |
| <i>CARD9</i>    | ACCAGGAGCAGGTTTTGC       | GCCATCCTTTCTGCATCTTC       |
| <i>CCL2</i>     | ACCGAGAGGCTGAGACTAAC     | GCATTGATTGCATCTGGCTGA      |
| <i>CCL5</i>     | GGGTGACAAAGACGACTGCT     | CCTGCTGCTTTGCCTACATT       |
| <i>CLEC5A</i>   | GGCAATGTTACCAATCAGAATCA  | TCATTTGGCATTCTTCTCACAG     |
| <i>CXCL10</i>   | CCAATTTTGTCCACGTGTTG     | TTCTTGATGGCCTTCGATTTC      |
| <i>IFIT1</i>    | TTACAGCAACCATGAGTACAA    | TGCTCCAGACTATCCTTGAC       |
| <i>IFNA1</i>    | GCCATCTCTGTCTCCATGA      | TGGTAGAGTTCGGTGCAGAAT      |
| <i>IFNB1</i>    | CATTACCTGAAGGCCAAGGA     | CAGCATCTGCTGGTTGAAGA       |
| <i>IFNG</i>     | TGACCAGAGCATCCAAAAGA     | ATTGCTTTGCGTTGGACATT       |
| <i>IL10</i>     | ATCGATGACAGCGCCGTAG      | GATGCCCAAGCTGAGAAC         |
| <i>IL12</i>     | TTTCTTTTCTCTTGCTCTTGC    | GTGGAGGTCAGCTGGGAGTA       |
| <i>IL18</i>     | TTTAAGGAAATGAATCCTCCTGAT | TTCAAATTGCATCTTATTATCATGTC |
| <i>IL1B</i>     | GGACAGGATATGGAGCAACAA    | TCTTTCAACACGCAGGACAG       |
| <i>IL2</i>      | AGCTCAAAGCAAAAACCTTTCAC  | TGTTGTTTCAGATCCCTTTAGTTC   |
| <i>IL6</i>      | GCATCTAGATTCTTTGCCTTTTT  | GAAAATCATCACTGGTCTTTTTGG   |
| <i>IRF3</i>     | TCGAGGTGACAGCCTTCTAC     | GCCTCACGTAGCTCATCACT       |
| <i>IRF7</i>     | TGATGCTGCGGGATAACTC      | CCTGTGGTGGTGGGACAG         |
| <i>ISG15</i>    | GAGAGGCAGCGAACTCATCT     | CCAGCATCTTACCCTGCAG        |
| <i>NCF4</i>     | TGGAGGAAGTGAGAGGTGAA     | TGTTCAAAGTCACTCTCGGC       |
| <i>NFKB</i>     | CGGTGACAGGAGACGTGAA      | ACCCAAGCGGTCCAGAA          |
| <i>NQO2</i>     | AACTCCTAGAGCGGTCTTTG     | GAGTCCAGCAATCTTCCGAC       |
| <i>NRLP3</i>    | GCTTCAGGTGTTGGAATTAGACA  | GTCGCCCAGGTCATTGTT         |
| <i>SOD2</i>     | CAGCGGTAGCACCAGCACTA     | GAGCCCAGATACCCCAAAAC       |
| <i>STAT1</i>    | AACCGCATGGAAGTCAGGTT     | ATGGGCTTCATCAGCAAGGA       |
| <i>STAT2</i>    | CCAGATTTGCCCTGTGATCT     | AAACCTCATCCACGGTGTTC       |
| <i>TGFB</i>     | GACCTTGCTGTACTGCGTGT     | AAGGACCTCGGCTGGAAGT        |
| <i>TLR3</i>     | TGCAAAAGATTCAAGGTACATCA  | CCAGTTCAAGATGCAGTGAGA      |
| <i>TLR4</i>     | AGCTTCTTCAGTTTCCCAGAAC   | AAAGGCTCCCAGGGCTAAAC       |
| <i>TLR7</i>     | AAAATGGTGTTCCTCAATGTG    | GTCTGTGCAGTCCACGATCA       |
| <i>TMEM59</i>   | ATTTGACTCGGTCTTGGGTG     | ACAACCTCTCTCCTTAGGGT       |
| <i>TNFA</i>     | GAGGGTTTGCTACAACATGG     | CCCCAGGGACCTCTCTCTA        |
| <i>B2M</i>      | GGCTCGCTCGGTGACCCAGTCTTT | TCTGCAGGCGTATGTATCAGTCTCA  |
| <i>18S</i>      | AGGATGAGGTGGAACGTGTG     | CTTACGGAGCTTGTGTGCC        |
| <i>PPIA</i>     | TGTTCTTCGACATTGCCGTC     | TGTCTGCAAACAGCTCAAAG       |
| <i>GAPDH</i>    | AGTGATGGCATGGACTGTGGTCAT | CAACAGCCTCAAGATCATCAGCAA   |

Supplementary Table 2. Primers used in gene expression method for *in vivo* assays.

| Gene           | Sense                   | Antisense                |
|----------------|-------------------------|--------------------------|
| <i>IL1B</i>    | TGCCACCTTTTGACAGTGATG   | ATGTGCTGCTGCGAGATTTG     |
| <i>IL6</i>     | GTTCTCTGGGAAATCGTGGA    | TGTACTIONCAGGTAGCTATGG   |
| <i>IL18</i>    | TACAAGCATCCAGGCACAGC    | GGCAGGAGTCCAGAAAGCAT     |
| <i>IL10</i>    | ATTCCCTGGGTGAGAAGCTG    | TAGACACCTTGGTCTTGGAGCTTA |
| <i>CCL2</i>    | CACTCACCTGCTGCTACTCA    | GAGCTTGGTGACAAAACTACAGC  |
| <i>IFNB1</i>   | AACTCCACCAGCAGACAGTG    | TGAGGACATCTCCCACGTCA     |
| <i>TLR4</i>    | AACTCAGCAAAGTCCCTGATG   | ATTGTTTCAATTTACACCTGGAT  |
| <i>TLR9</i>    | AGAGACCCTGGTGTGGAAC     | CTTCGACGGAGAACCATGT      |
| <i>FHT1</i>    | CCGAGATGATGTGGCTCTGAA   | CAGTCATCACGGTCTGGTTTCTTT |
| <i>NOX1</i>    | AGTTTCTCTCCCGAAGGACCTC  | GGTTAACCAGCCAGTTTCCCA    |
| <i>CASP1</i>   | TGGTCTTGTGACTTGGAGGA    | TGGCTTCTTATTGGCACGAT     |
| <i>GADD45G</i> | AAGTCCTGAATGTGGACCCTG   | ATGGATCTGCAGCGCTATGT     |
| <i>CLEC5A</i>  | TTTTTCTGCTGTATTTCCACACA | ACGAAGCCATCATTACTTTTGC   |
| <i>B2M</i>     | CAAGACCGTCTACTGGGATCG   | TTGCTATTTCTTTCTGCGTGC    |
| <i>PPIA</i>    | GCTTTTCGCCGCTTGCT       | CTCGTCATCGGCCGTGAT       |
| <i>GAPDH</i>   | AACTTTGGCATTGTGGAAGG    | GGAGACAACCTGGTCCTCAG     |

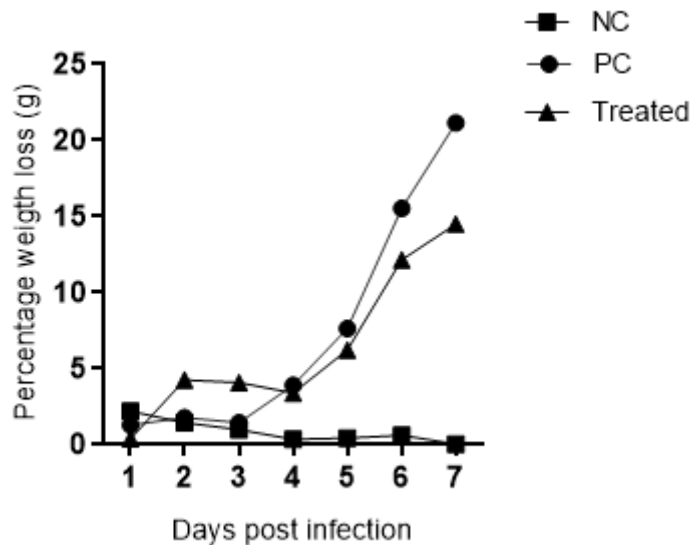

Supplementary Figure 1. Percentage weight loss from k18-ACE2 mice groups infected with SARS-CoV-2 Wuhan strain and treated with bovine lactoferrin (Treated). Legend: NC= refers to non-infected, non-treated animals; PC= positive control, infected animals; Treated= infected, treated animals.

Clinical Signs (%)

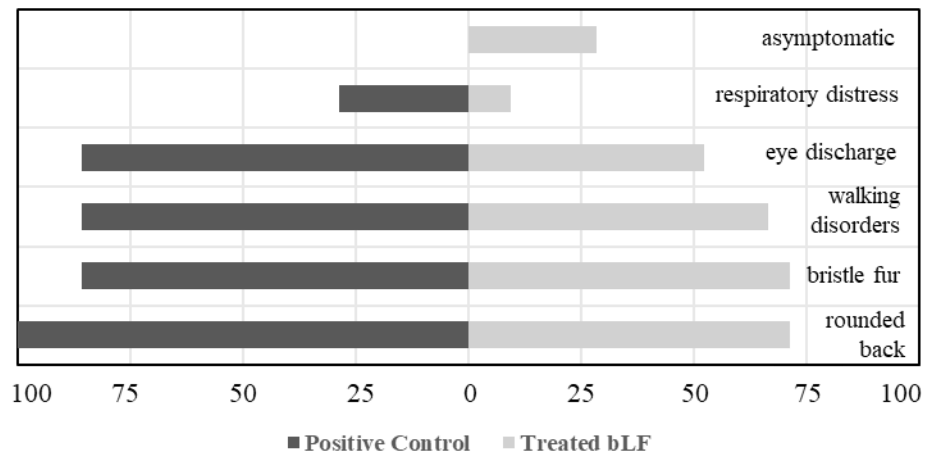

Supplementary Figure 2. The percentage of the clinical signs presented from k18-ACE2 mice groups infected with SARS-CoV-2 Wuhan strain and treated with bLf.
